# Supplementary material for: Genome-wide identification of the WRKY gene family in Angraecum sesquipedale and exploration of its role in cold stress response
Source: Research Square preprint supplement (doi:10.21203/rs.3.rs-7505680/v1), 2025-09-16
Supplement: Supplementary file 1 [file b224558ba76ce225577e0f20.xlsx]

## Sheet: Sheet1
Table. S1 Physicochemical properties and subcellular localization predictions of AsWRKY gene family members.
gene ID	squence ID	Group	Number of Amino Acid	Molecular Weight	Theoretical pI	Instability Index	Aliphatic Index	Grand Average of Hydropathicity	Subcellular Localization
AsWRKY1	DEW017737	IIc	117	13641.4	9.48	51.91	52.39	-1.004	Cytoplasm
AsWRKY10	DEW014859	IIc	126	14436	9.55	33.42	64.92	-0.918	Nucleus
AsWRKY11	DEW023870	III	320	35933.9	4.8	55.01	64.28	-0.628	Nucleus
AsWRKY12	DEW002099	IIe	229	25842.4	8.73	55.51	68.17	-0.786	Nucleus
AsWRKY13	DEW004325	IIc	201	22930.3	8.77	36.22	64.48	-1.047	Nucleus
AsWRKY14	DEW004736	IIe	324	35812.8	6.67	60.68	54.2	-0.79	Nucleus
AsWRKY15	DEW011541	IIc	302	34193.6	6.26	50.69	70.66	-0.618	Nucleus
AsWRKY16	DEW013189	III	270	30707.4	5.62	59.11	64	-0.736	Nucleus
AsWRKY17	DEW018823	IIc	345	39242.5	9.11	47.27	65.65	-0.521	Nucleus
AsWRKY18	DEW018824	IIc	384	43163.3	5.56	46.43	69.53	-0.696	Nucleus
AsWRKY19	DEW013542	IIe	353	38836	5.5	49.24	56.37	-0.739	Nucleus
AsWRKY2	DEW015275	IIc	145	16399.6	9.26	51.3	57.72	-0.733	Nucleus
AsWRKY20	DEW017457	IIc	201	23153.9	8.85	44.04	50.35	-0.933	Nucleus
AsWRKY21	DEW016231	IIb	554	59485.6	6.71	50.73	63.54	-0.53	Nucleus
AsWRKY22	DEW000566	I	637	69686.9	5.64	57.48	57	-0.763	Nucleus
AsWRKY23	DEW000652	IIa	277	29944.7	7.55	46.61	67.65	-0.555	Nucleus
AsWRKY24	DEW026013	III	198	22189.8	5.05	63.88	58.13	-0.599	Nucleus
AsWRKY25	DEW026610	III	165	18962.6	10.17	56.82	63.27	-0.548	Chloroplast
AsWRKY26	DEW006497	IId	362	40641.8	9.71	50.76	77.29	-0.444	Cytoplasm
AsWRKY27	DEW010488	I	445	49942.3	8.95	50.52	48.65	-0.905	Nucleus
AsWRKY28	DEW006801	III	265	29694.4	5.93	68.01	75.13	-0.494	Nucleus
AsWRKY29	DEW006802	III	262	28877.3	6.59	58.15	63.4	-0.54	Nucleus
AsWRKY3	DEW015289	IIe	301	32819.3	5.37	59.81	49.4	-0.702	Nucleus
AsWRKY30	DEW006640	I	494	54095.2	7.69	54.26	52.15	-0.864	Nucleus
AsWRKY31	DEW015476	III	313	33643.6	5.9	59.36	74.28	-0.318	Nucleus
AsWRKY32	DEW008465	I	556	59852.6	6.46	51.63	65.47	-0.705	Nucleus
AsWRKY33	DEW012282	IIe	316	34665	7.09	52.01	69.3	-0.522	Chloroplast
AsWRKY34	DEW012293	IIc	190	21402.3	9.26	44.95	67.21	-0.684	Nucleus
AsWRKY35	DEW023697	IIb	485	53857.5	7.54	56.07	63.61	-0.692	Nucleus
AsWRKY36	DEW021418	III	400	44991.5	5.63	45.38	65.35	-0.633	Nucleus
AsWRKY37	DEW021710	IIc	221	24764.4	5.12	45.62	62.67	-0.649	Chloroplast
AsWRKY38	DEW024157	I	555	62329.5	8.51	60.07	52.7	-0.881	Nucleus
AsWRKY39	DEW005075	III	297	32874.5	5.2	50.62	61.41	-0.608	Nucleus
AsWRKY4	DEW024440	IIe	308	33723.4	5.49	63.28	51.75	-0.693	Nucleus
AsWRKY40	DEW017765	IIc	119	13899.6	9.11	43.21	53.36	-1.161	Nucleus
AsWRKY41	DEW011298	IIc	254	27555.6	6.08	54.83	57.2	-0.728	Nucleus
AsWRKY42	DEW020986	IIe	393	43640.6	6.29	55.15	53.18	-0.826	Nucleus
AsWRKY43	DEW010873	I	502	54552	6.84	57.91	60.48	-0.791	Nucleus
AsWRKY44	DEW014681	IId	340	37658.7	9.97	57.05	66.32	-0.756	Nucleus
AsWRKY45	DEW023486	IIa	164	18544.6	6.95	44.98	106.95	-0.03	Plasma Membrane
AsWRKY46	DEW023487	IIa	312	34629.7	8.95	55.7	65.93	-0.743	Nucleus
AsWRKY47	DEW024919	IIc	296	33010.8	9.06	38.92	60.57	-0.974	Nucleus
AsWRKY48	DEW025555	IIa	240	26270.5	6.35	51.36	72.42	-0.539	Nucleus
AsWRKY49	DEW024059	IId	331	35453.5	9.76	48.81	73.17	-0.312	Nucleus
AsWRKY5	DEW019306	IIc	316	35061.7	6.52	61.39	46.93	-0.833	Nucleus
AsWRKY50	DEW026204	I	73	8481.69	9.07	29.86	53.42	-0.774	Nucleus
AsWRKY51	DEW022782	I	627	69104.4	5.45	54.76	59.11	-0.636	Nucleus
AsWRKY52	DEW015217	I	554	59693.8	7.71	52.93	68	-0.577	Nucleus
AsWRKY53	DEW022839	IIc	325	36911.6	6.34	60.19	74.68	-0.797	Nucleus
AsWRKY54	DEW014031	IIe	208	22658	4.76	44.71	60	-0.748	Nucleus
AsWRKY55	DEW015825	IIc	119	13716.5	8.9	53.26	68.74	-0.863	Cytoplasm
AsWRKY56	DEW005303	III	302	34304.4	6.42	57.8	58.48	-0.746	Nucleus
AsWRKY57	DEW005206	IIc	266	29166.6	6.99	58.26	59.06	-0.788	Nucleus
AsWRKY58	DEW022363	III	228	25672.8	8.42	44.67	63.38	-0.809	Nucleus
AsWRKY59	DEW017721	IIc	241	27199.9	9.61	42.69	68.38	-0.63	Nucleus
AsWRKY6	DEW019361	IIe	275	29645.5	5.3	67.03	49.13	-0.784	Nucleus
AsWRKY60	DEW012924	IIc	244	27762.9	9.75	47.88	82.7	-0.463	Nucleus
AsWRKY61	DEW015078	IIc	316	35602.7	9.53	73.33	73.48	-0.525	Nucleus
AsWRKY62	DEW017653	IIc	193	22366.5	9.8	41.42	52.95	-1.01	Nucleus
AsWRKY63	DEW016488	IIc	113	13337.2	8.6	32.36	53.36	-1.212	Nucleus
AsWRKY64	DEW009004	I	532	58202.2	8.33	58.36	53.78	-0.816	Nucleus
AsWRKY65	DEW008879	I	248	27595.3	9.88	31.85	101.09	-0.098	Nucleus
AsWRKY66	DEW008881	IIc	135	15392.4	9.38	60.74	68.67	-0.596	Chloroplast
AsWRKY67	DEW025492	IIe	187	21848.5	9.5	37.77	81.93	-0.322	Nucleus
AsWRKY68	DEW002632	IIb	458	49888.2	5.39	52.59	67.42	-0.483	Nucleus
AsWRKY69	DEW019973	I	665	72967.7	5.73	56.36	56.2	-0.666	Nucleus
AsWRKY7	DEW010407	I	592	64081.7	5.97	51.7	63.6	-0.658	Nucleus
AsWRKY70	DEW026948	I	183	20533.2	9.58	37.94	53.33	-1.064	Nucleus
AsWRKY8	DEW008702	IIc	162	19129.8	9.34	43.37	57.72	-1.041	Nucleus
AsWRKY9	DEW012829	IIc	410	46232.6	6.01	47.11	66.34	-0.625	Nucleus
