# Supplementary material for: Genome-wide identification of the WRKY gene family in Angraecum sesquipedale and exploration of its role in cold stress response
Source: Research Square preprint supplement (doi:10.21203/rs.3.rs-7505680/v1), 2025-09-16
Supplement: Supplementary file 2 [file f2578dde07db78e9190125b2.docx]

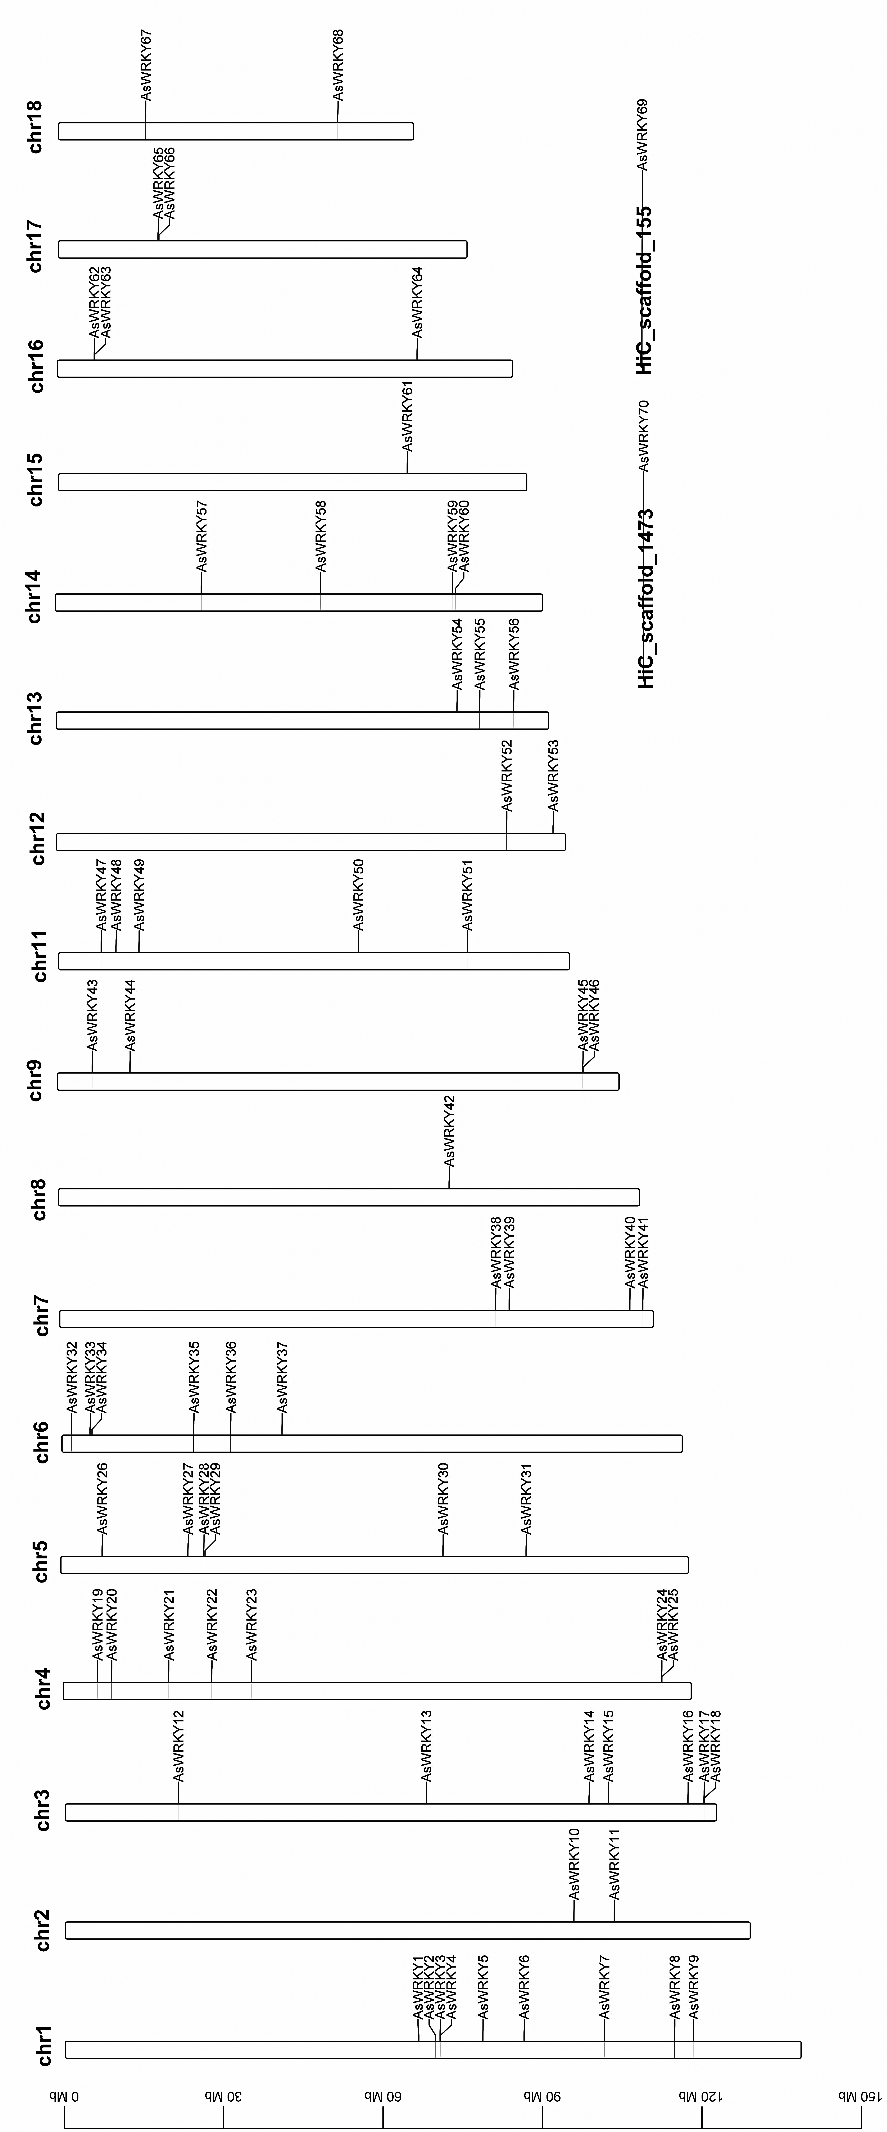
**Fig. S1** Chromosomal localization and distribution of the WRKY Gene Family in *A. sesquipedale*.


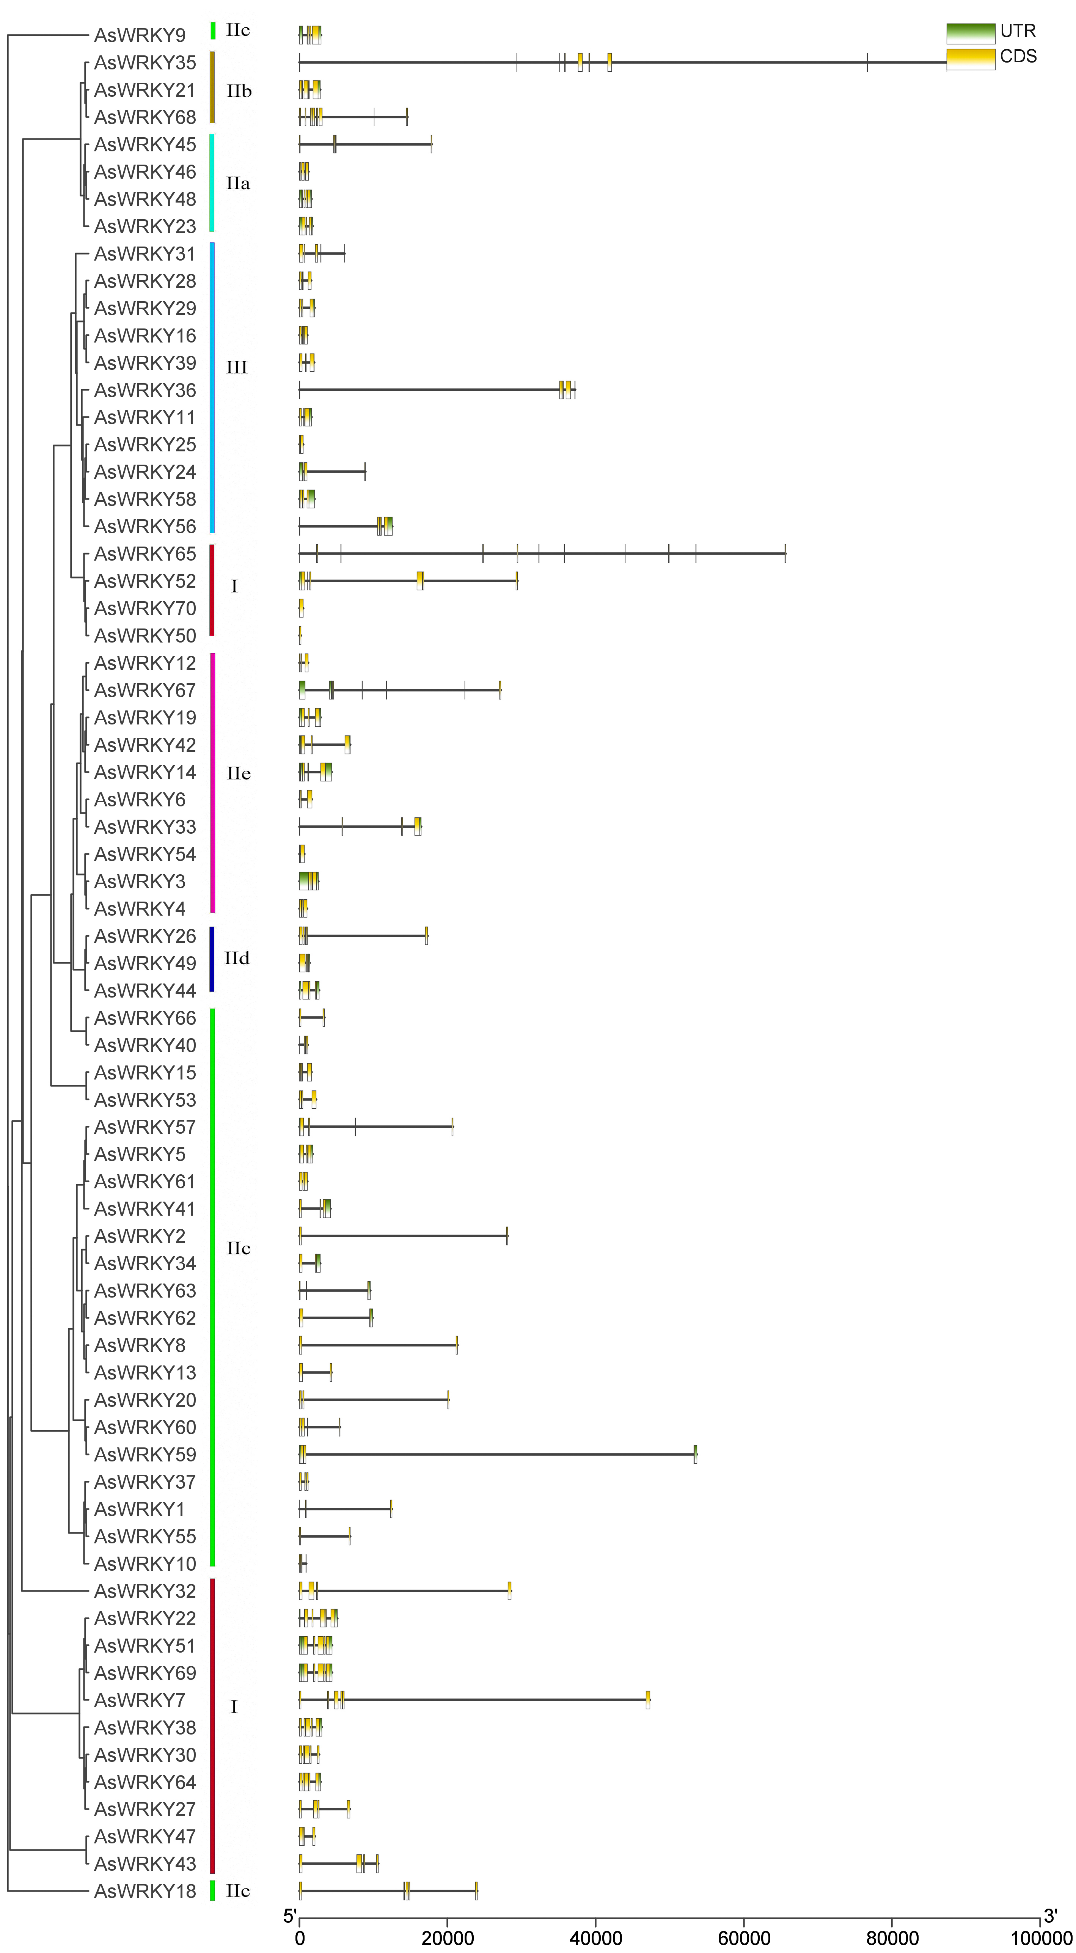
**Fig. S2** Comprehensive Analysis of Conserved Motifs and Gene Structure in AsWRKY proteins. In the gene structure diagram, yellow boxes and lines represent exons and introns, respectively.


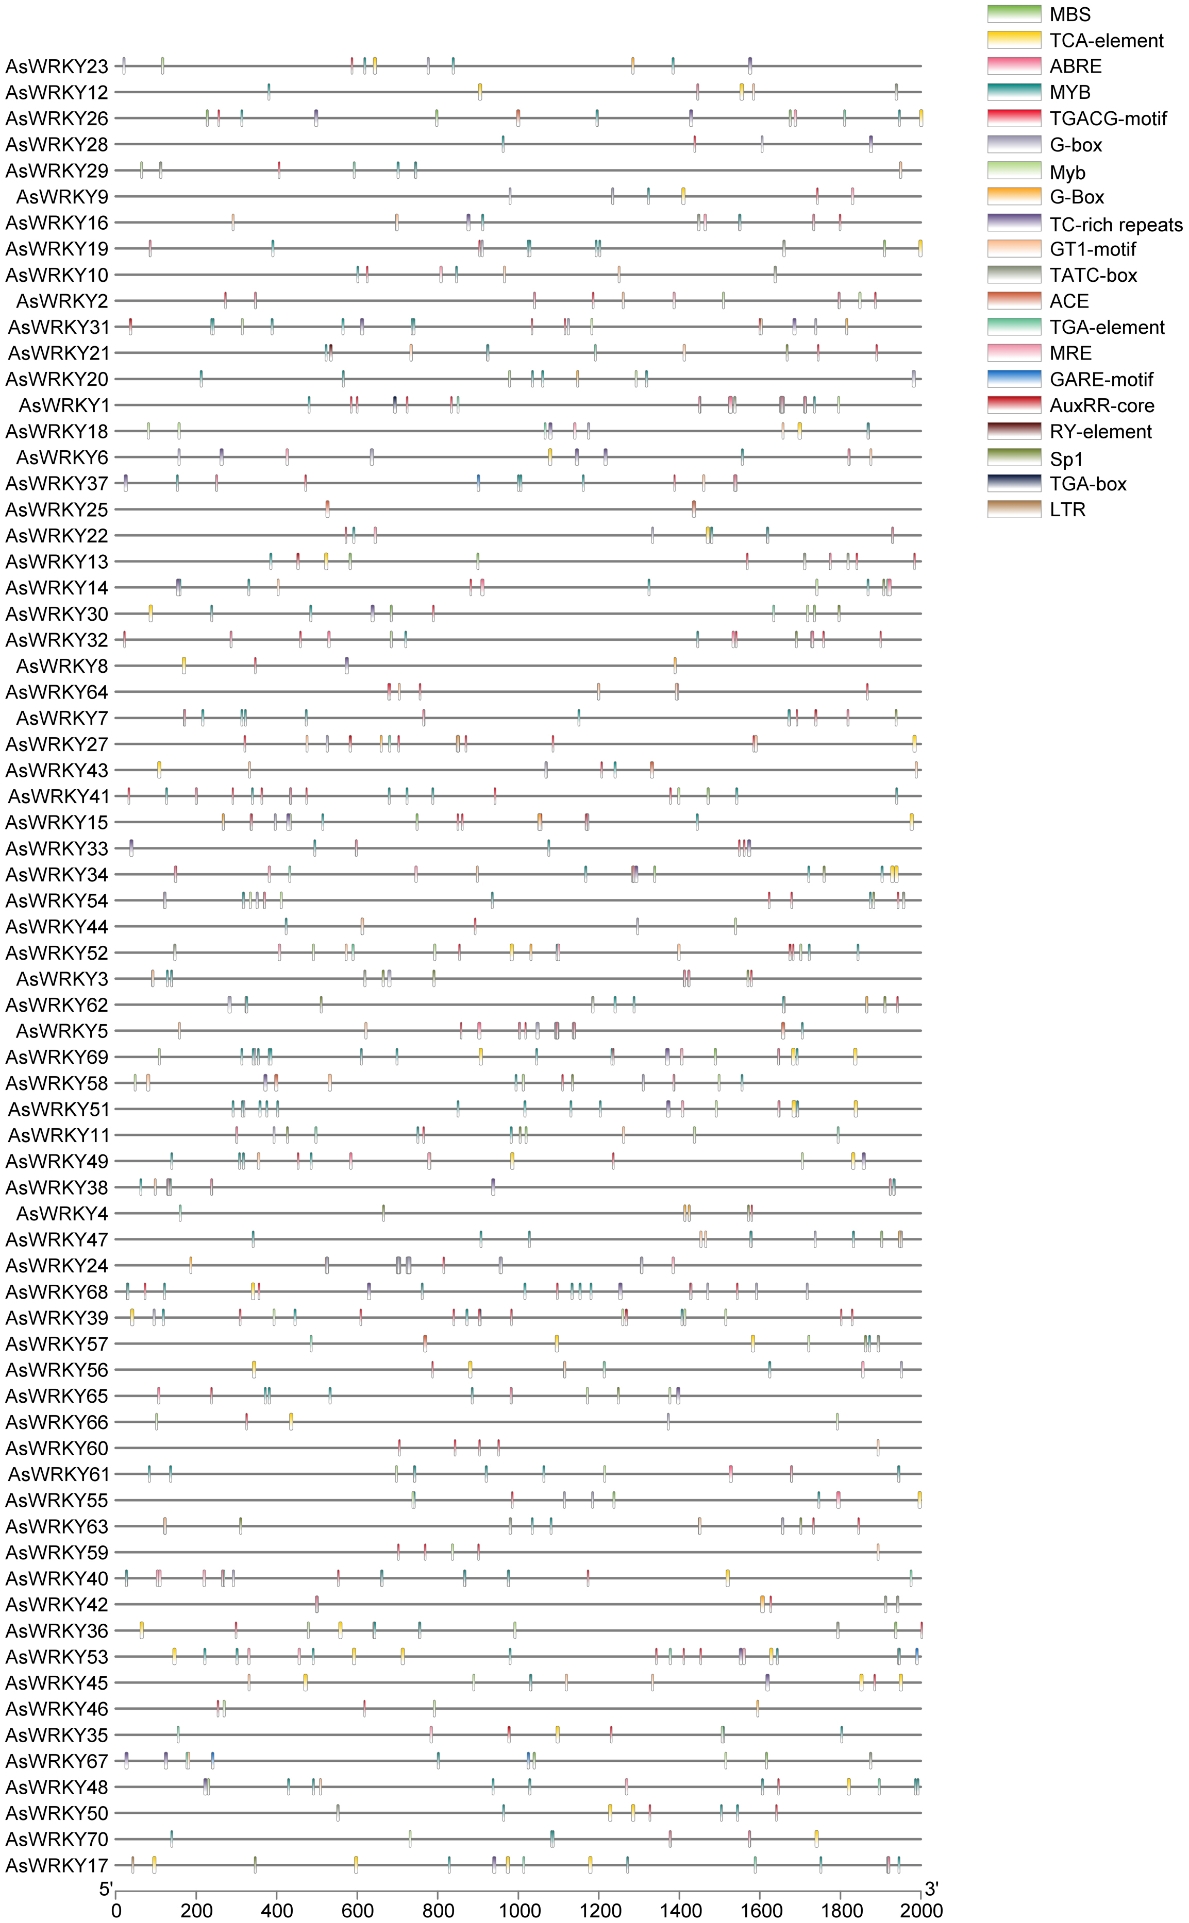
**Fig. S3** Prediction of cis-responsive elements in the 1500 bp upstream regulatory regions of *AsWRKYs*. Different cis-responsive elements are represented by different colored boxes.


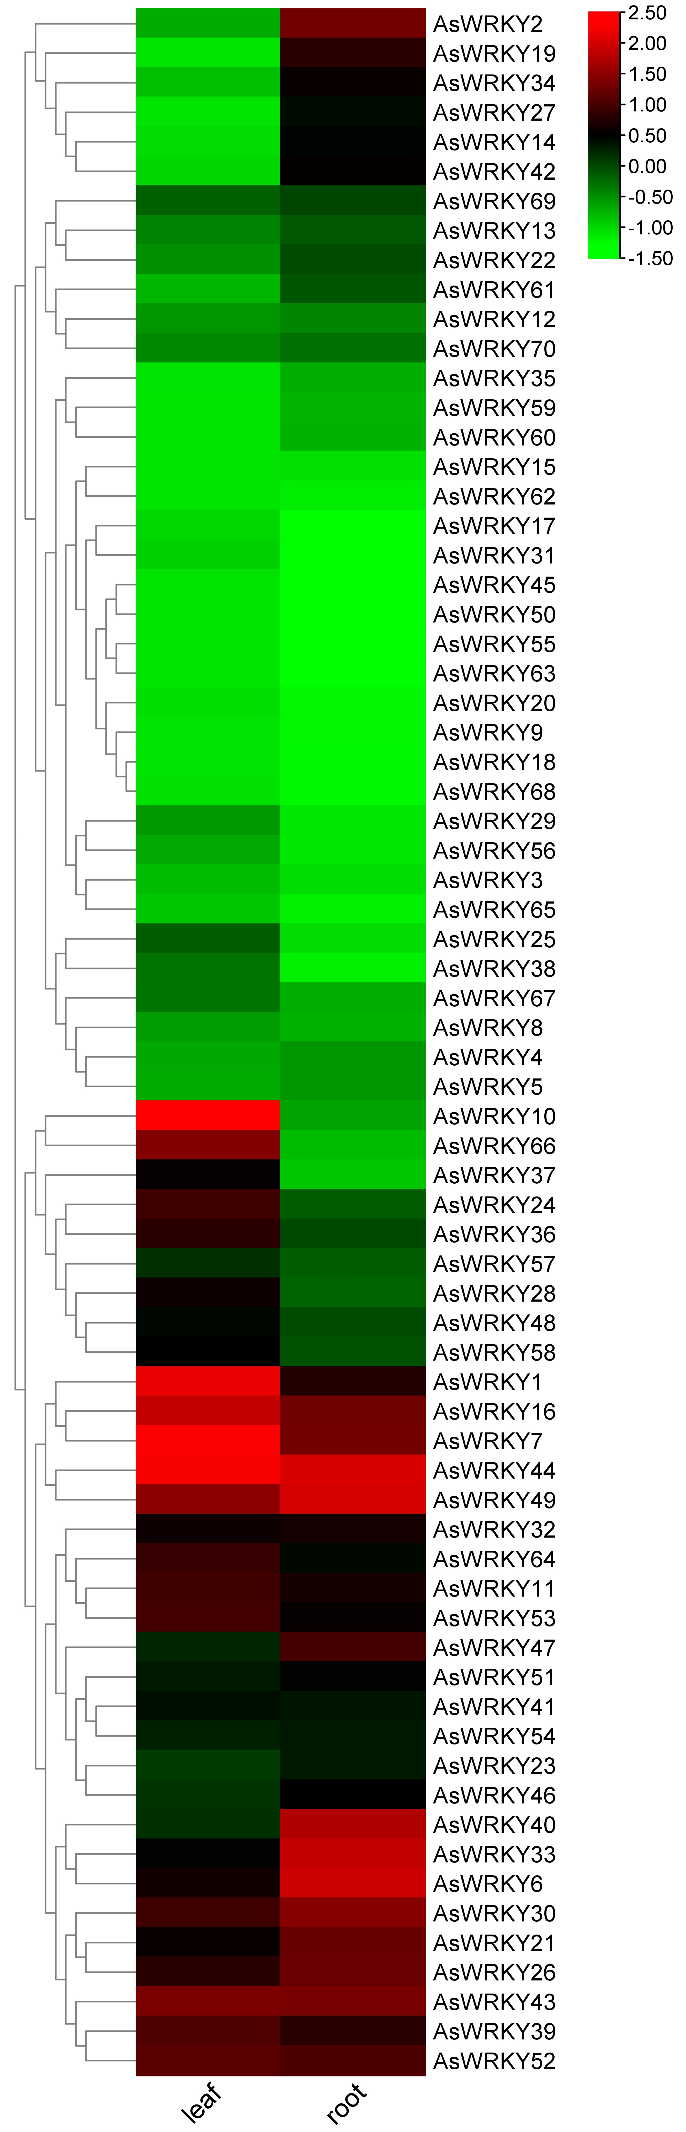
**Fig. S4** Expression profile analysis of *AsWRKYs* in two tissues. Transcriptome data were used to measure the expression levels of *AsWRKYs* in roots, leaves. The colored scale for the different expression levels is shown.
